# Supplementary material
Source: PubMed Central journal article supplement (PMC438961)

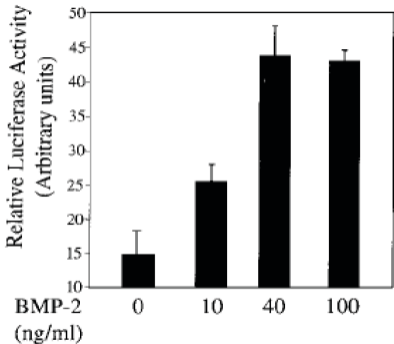

Supplement: pnas_101_25_9247__2.pdf [file pnas_101_25_9247__2.pdf]

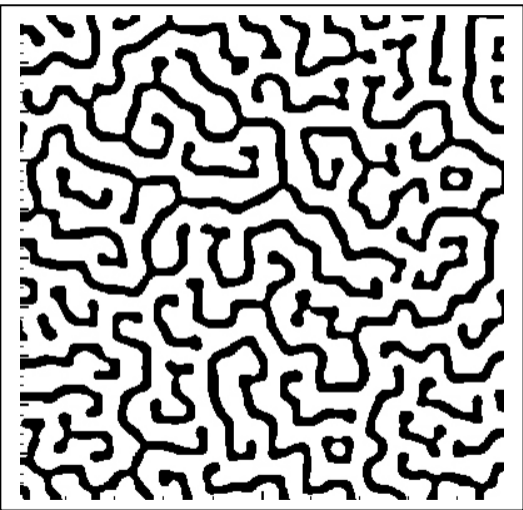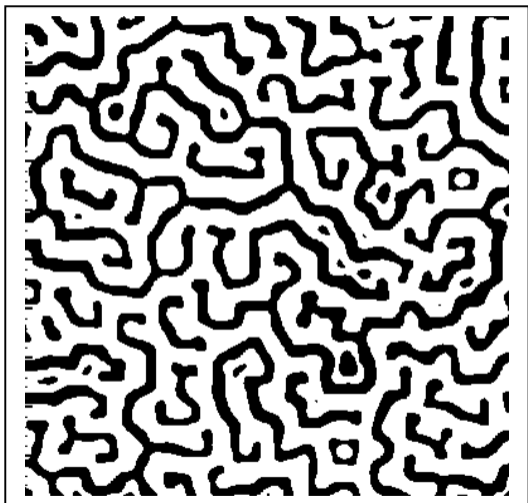

Supplement: pnas_101_25_9247__3.pdf [file pnas_101_25_9247__3.pdf]
